# Supplementary material
Source: PubMed Central journal article supplement (PMC7104245)
Supplement: pnas.1919698117.sapp.pdf [file pnas.1919698117.sapp.pdf]

## Inventory of the Supplementary Information

- Fig. S1. Biochemical interaction between SCGN and SNAP-25.
- Fig. S2. Sequence comparison of SCGN from different model organisms.
- Fig. S3. Structural comparison of SCGN in the Apo and Holo forms.
- Fig. S4. GST-hsSCGN wild-type or mutants, or GST pull-down of SNAP-25.
- Fig. S5. In vitro vesicle fusion assay.
- Fig. S6. Mutagenesis to verify the interaction between SCGN and SNAP-25.
- Fig. S7. Engineering *Scgn*-deficient STC-1 clones by CRISPR/Cas9 technology.
- Fig. S8. SCGN does not control the subcellular localization of syntaxin-1.
- Fig. S9. SCGN promotes plasma membrane localization of SNAP-25 in pancreatic beta cells.
- Fig. S10. Knockout of SNAP-25 does not alter the subcellular localization of syntaxin-1.
- Fig. S11. Knockdown of SCGN led to abnormal brain development in zebrafish.
- Fig. S12. SCGN knockout in zebrafish.
- Fig. S13. SCGN is critical for normal development of motor neuron.
- Fig. S14. Overexpression of SNAP-25 failed to restore hormone secretion in STC-1 deficient cells.
- Fig. S15. A model showing how SCGN may regulate SNARE function and exocytosis.
- Table S1. Crystallography Data Collection and Refinement Statistics.
- Table S2. DNA Constructs Used in this Study.
- Table S3. Summary of Antibodies Used in this Study.

- Table S4: Sequences of Primers, CRISPR Targeting Regions, and Morpholino.

A

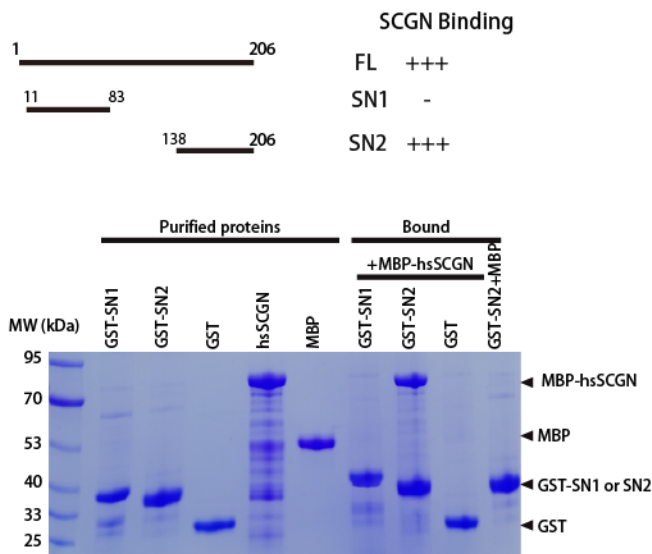

B

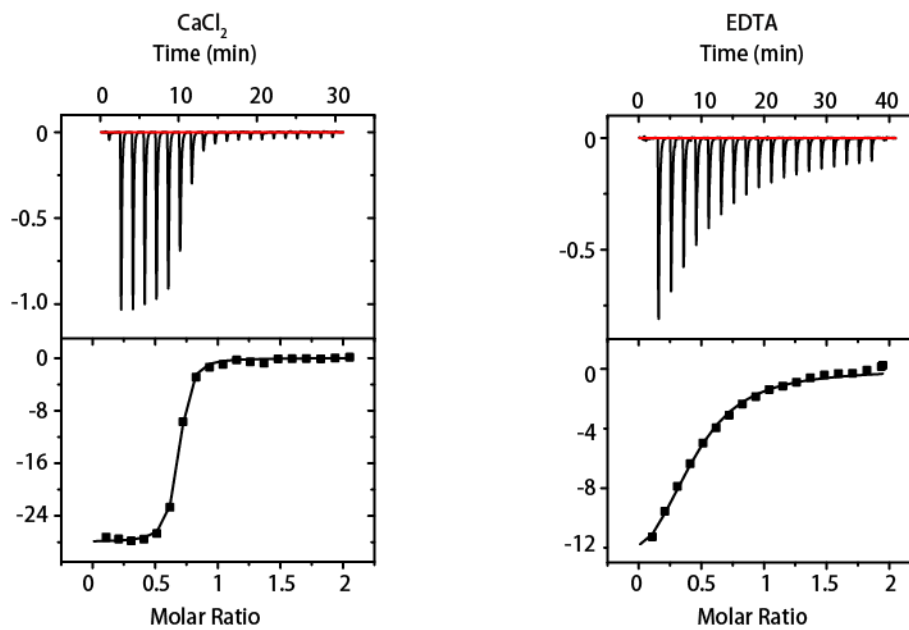

**Fig. S1. Biochemical interaction between SCGN and SNAP-25.**

(A) GST pull-down assays performed with GST-SNAP-25 fragments or GST, and purified MBP-hsSCGN, in the presence of 2 mM CaCl<sub>2</sub> and 0.005% Triton X-100. After

incubation with soluble proteins, the resin was extensively washed. The resin-bound proteins were then subjected to SDS-PAGE and Coomassie Blue staining.

(B) Isothermal titration calorimetry of SNAP-25-J titrated into hsSCGN in a buffer containing 2 mM  $\text{CaCl}_2$  (left) or 2 mM EDTA (right) at 25°C. Top and bottom panels show raw and integrated heat from injections, respectively. The black curve in the bottom panel represents a fit of the integrated data to a single-site binding model.

*Homo\_sapiens*

1 10 20

*Homo\_sapiens* .....MDSSREPTLGRLDAAAGFWQVWQRFDA  
*Bos\_taurus* .....MDSAREPTQGS LDAAGFWQVWQRFDV  
*Mus\_musculus* .....MDNARRKTPARLDAACFWQVWQRFDA  
*Gallus\_gallus* .....MESGAERRLDAAAF LGAWRRFDA  
*Danio\_riero* .....MDSAFANLDAAGFLQVWQHFDA  
*Drosophila\_melanogaster* MDSAAAAAAKRVQIEKAHNFMQRQYRDPESRELEKLSANQFMDVVAHYDK  
*consensus>50* .....md..re.t..rLdAagFlqvWqr%DA

*Homo\_sapiens*

30 40 50 60 70

*Homo\_sapiens* DEKGYIEEKELDAFFLHMLMLKLGTD...VMTKANLHKVKQQQMTTQD  
*Bos\_taurus* EEKGYIEEKELDAFFYHMLTKLGVDDA...VKEENVQKMKQQQMAPHD  
*Mus\_musculus* EEKGYIRETELDAFFDHLAKSGTED...LMEENVQKVKEQMTSHN  
*Gallus\_gallus* DDNGYIEGKELDNFFRHLLKLRPDD...ITEEVQRMKEQPMASAYD  
*Danio\_riero* DDNGYIEGKELDDFFRHMLKQLPKDK...ITDERVQQIKKSPMSAYD  
*Drosophila\_melanogaster* DNGYIEGTELDFLREFVSSANATDISPEAVDTMLLEELKSCPMASAYD  
*consensus>50* #enGYieekELDAffrhmll.klg.dDt...vteenvqkvKqqfM.ay#

*Homo\_sapiens*

80 90 100 110 120

*Homo\_sapiens* ASKDGRI RMKELAGMFLSEDENFLLFRRENPLDSSVEFMQIWRKYDAD  
*Bos\_taurus* VSKDGC IQMKELAGMFLSEDENFLLFRQETPLDSSVEFMRIWRKYDAD  
*Mus\_musculus* VSKEGRILMKELAS MFLSEDENFLLFRLETPLDSSVEFMQIWRKYDAD  
*Gallus\_gallus* VTTDGR LQIQELANVILPDDENFLLFRRETPLDSSVEFMRIWRKYDAD  
*Danio\_riero* ATFDGR LQIEELANMILPQENFLLIFRREAPLDSSVEFMKIWRKYDAD  
*Drosophila\_melanogaster* DNQD GKIDIRELAQLLPMEENFLLFRFDNPLSSVEFMKIWRKYDAD  
*consensus>50* vsk#GriqikELA.mfLpe#ENFLLlFRr#tPL#nSVEFM.IWRKYDaD

*Homo\_sapiens*

130 140 150 160

*Homo\_sapiens* SSGFISAAELRNFLRDLFLHKKAA..ISEAKLEEYTGTMKKIFDRNKDG  
*Bos\_taurus* SSGFISAAELCNFLRDLFLHKKAA..ISEAKLEEYTGTMKKIFDRNKDG  
*Mus\_musculus* SSGFISAAELCNFLRDLFLHKKKN..ISEAELEEYTGTMKKIFDRNKDG  
*Gallus\_gallus* GSGFISAGELKDFLRDLFLQHNRV..VTEVKLEEYDTMCKIFDRNKDG  
*Danio\_riero* SSGYISAAELKNFLKDLFLQHKK..IPPNKLEEYTDAMMKIFDRNKDG  
*Drosophila\_melanogaster* NSGYIEADELKNFLRDLLEAKKINDVSEDLLEEYDTMLQVFDANKDG  
*consensus>50* sSG%IsAaELk#FLrDLflqhkk...!seakLeEYtdtM\$K!FDKNDG

*Homo\_sapiens*

170 180 190 200 210

*Homo\_sapiens* RLDLNDLARI LALQENFLLQFKMDACSTEERKRD FEKIFAHYDVSKTGA  
*Bos\_taurus* RLDDLNDLARI LALQENFLLQFKMDACSSEERKRD FEKIFAHYDVSKTGA  
*Mus\_musculus* RLDDLNDLARI LALQENFLLQFKMDASSTEERKRD FEKIFAHYDVSKTGA  
*Gallus\_gallus* RLDDLNDLARI LALQENFLLQFKMDACSTEERRRD FEKIFAHYDVSKTGA  
*Danio\_riero* RLDDLNDLARI LALQENFLLQFKMDASSQVERKRD FEKIFAHYDVSKTGA  
*Drosophila\_melanogaster* RLQLSEMAKILLPVKENFLCQVFKG.ATKLTKEDEKVFSLYDRDNSGT  
*consensus>50* RL#Ln#\$AriLalqENFLLqfkmdacsteerkrDfEK!FahYDvsktGa

*Homo\_sapiens*

220 230 240 250 260

*Homo\_sapiens* LEGPEVDGFVKDMMELVQP.SISGVDLDFREILLRHCDVKNKGKIQKS  
*Bos\_taurus* LEGPEVDGFVKDMMELVQP.SIRGVDLDFREILLRHCDVKNKGKIQKS  
*Mus\_musculus* LEGPEVDGFVKDMMELVQP.SISGVDLDFREILLRHCDVKNKGKIQKS  
*Gallus\_gallus* LEGPEVDGFVKDMMELVQP.SISGVDLDFREILLRHCDVKNKGKIQKS  
*Danio\_riero* LEGPEVDGFVKDMMELVQP.SISGVDLDFREILLRHCDVKNKGKIQKS  
*Drosophila\_melanogaster* IENEELKGFVKDMMELVQP.DYDAQDLAAFEETIMRGVGTDKGKISRK  
*consensus>50* lEgpEvdGFvKD\$ELVqp..sisgvDLdkFr#il\$rhcdv#kdGKIqks

*Homo\_sapiens*

270

*Homo\_sapiens* ELALCLGLKINP.....  
*Bos\_taurus* ELALCLGLKINP.....  
*Mus\_musculus* ELALCLGLKINP.....  
*Gallus\_gallus* ELALCLGLKINP.....  
*Danio\_riero* ELALCLGLKHKP.....  
*Drosophila\_melanogaster* ELMILLLTLAKISPDDEE  
*consensus>50* ELA\$cLglkinp.....

**Fig. S2. Sequence comparison of SCGN from different model organisms.**

Sequence alignments were performed with ClustalW, with protein secondary structure listed above and consensus sequence listed below. ●: SNAP-25-binding residues confirmed by biochemical studies; ▲: Calcium-binding residues mutated in this study.

A

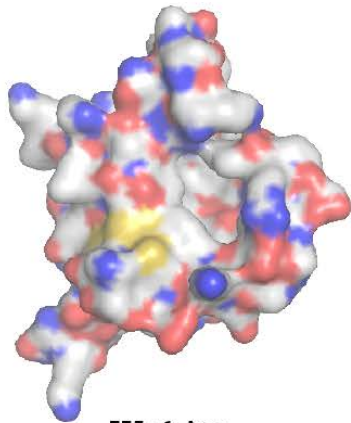

EF5+6: Apo

B

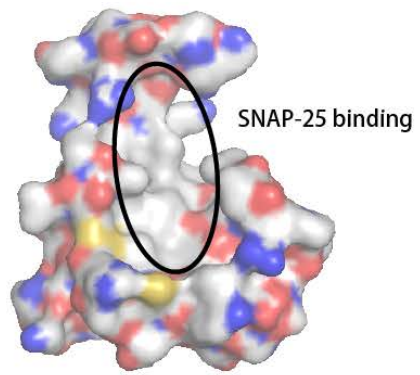

EF5+6: Holo

C

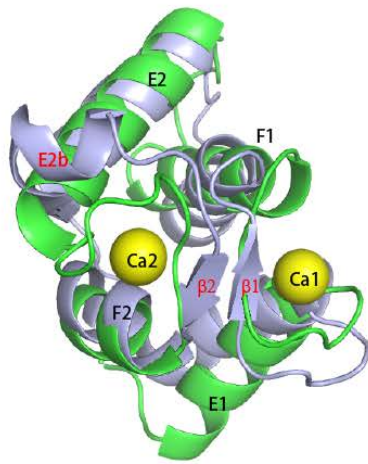

EF1+2

D

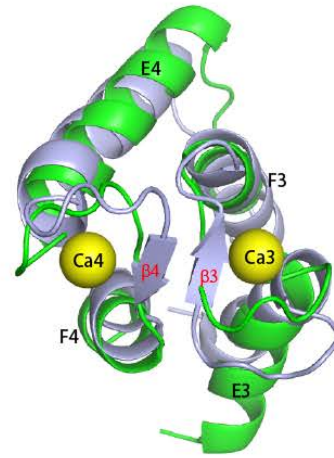

EF3+4

E

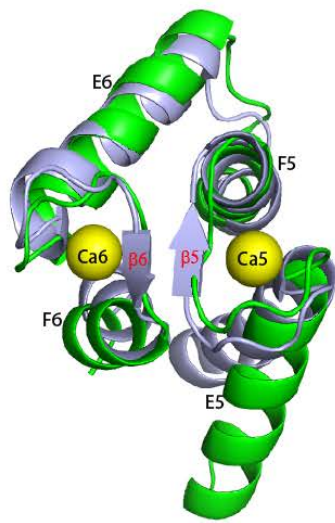

EF5+6

**Fig. S3. Structural comparison of SCGN in the Apo and Holo forms.**

(A-B) Surface presentation of EF hands 5+6 of SCGN in the Apo (A) and Holo forms (B).

Oval indicating the SNAP-25 binding groove. Blue: N atoms; red: O atoms; silver: C atoms; yellow: S atoms.

(C-E) All EF hands of SCGN undergo significant conformational changes upon the binding to  $\text{Ca}^{2+}$  and SNAP-25. Structural overlay of EF hands 1+2 (C), 3+4 (D), and 5+6 (E), of SCGN in the Apo (light blue) and Holo forms (green). The unique secondary structures, including the two-stranded  $\beta$ -sheets and helice E2b, in the apo form, are labeled in red.



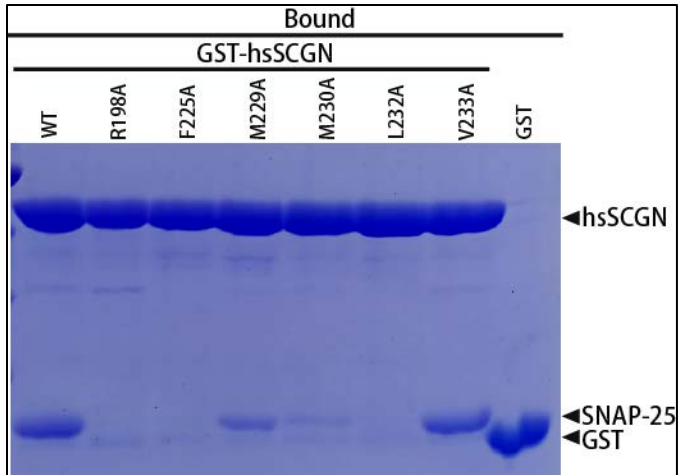

**Fig. S4. GST-hsSCGN wild-type or mutants, or GST pull-down of SNAP-25.**

GST pull-down assays performed with GST-hsSCGN wild-type or mutants, or GST, and purified SNAP-25 protein, in the presence of 2 mM CaCl<sub>2</sub> and 0.5% Triton X-100. After incubation with soluble proteins, the resin was extensively washed. The resin-bound proteins were then subjected to SDS-PAGE and Coomassie Blue staining.

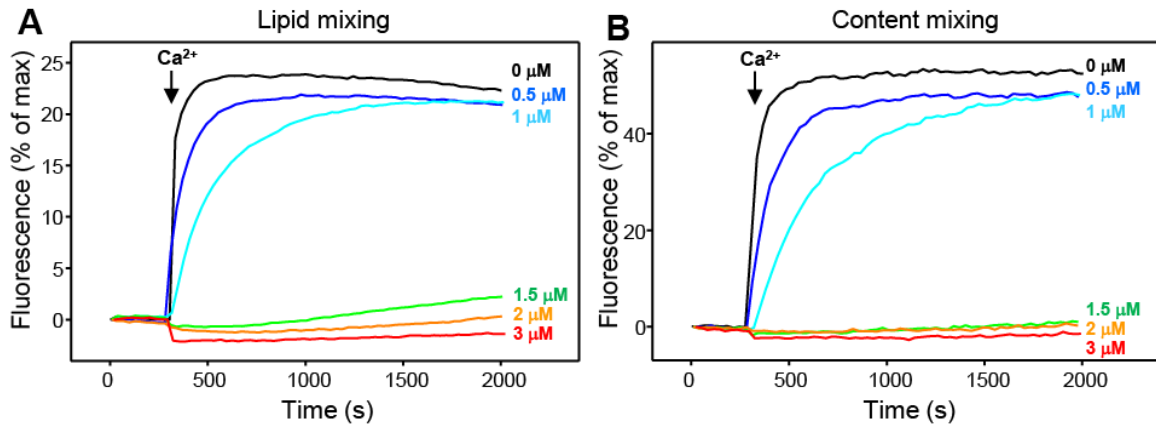

**Fig. S5. SCGN inhibits SNARE-dependent liposome fusion through interactions with SNAP-25.**

Lipid mixing (A) between V- and T-liposomes was monitored from the fluorescence de-quenching of Marina Blue lipids, and content mixing (B) was monitored from the increase in the fluorescence signal of Cy5-streptavidin trapped in the V-liposomes caused by FRET with PhycoE-biotin trapped in the T-liposomes upon liposome fusion. Assays were performed with V- and T-liposomes in the presence of Munc18-1, M13C<sub>1</sub>C<sub>2</sub>BMUNC<sub>2</sub>C, NSF, SNAP and variable concentrations of SCGN as indicated by the color-coded labels. Experiments were started in the presence of 100 μM EGTA and 5 μM streptavidin, and Ca<sup>2+</sup> (600 μM) was added at 300 s.

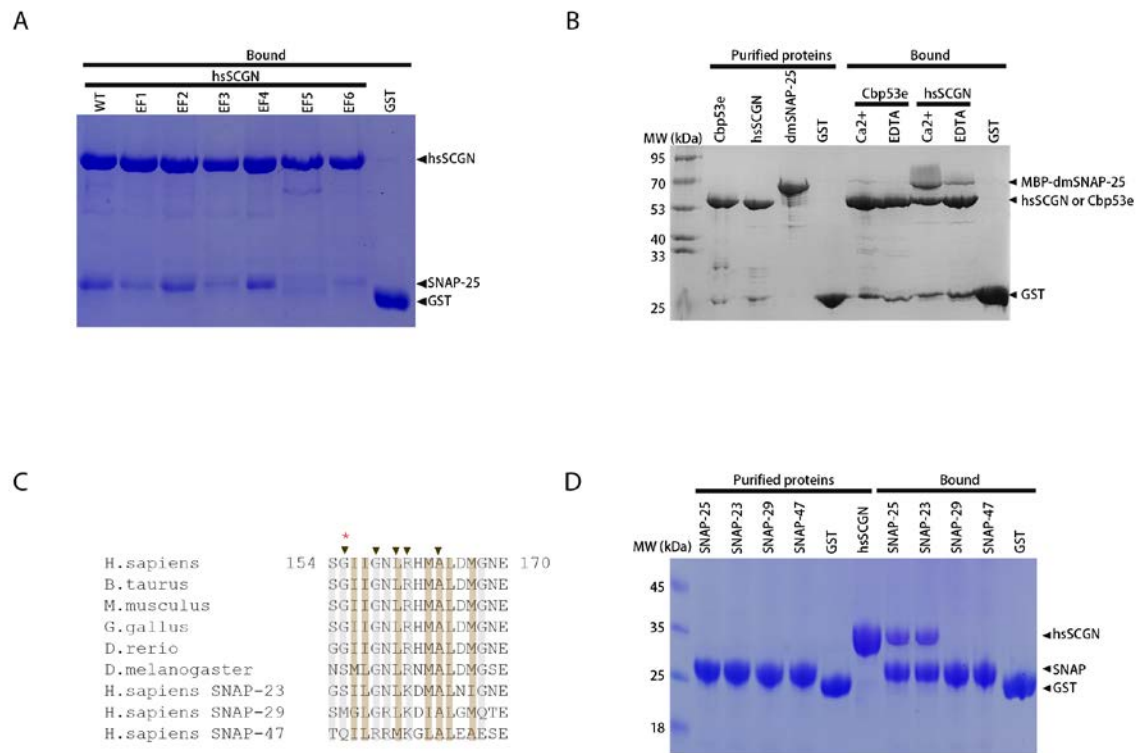

**Fig. S6. Mutagenesis to verify the interaction between SCGN and SNAP-25.**

(A) GST pull-down assays performed with GST-hsSCGN wild-type or mutants, or GST, and purified SNAP-25 protein, in the presence of 2 mM CaCl<sub>2</sub> and 0.5% Triton X-100. After incubation with soluble proteins, the resin was extensively washed. The resin-bound proteins were then subjected to SDS-PAGE and Coomassie Blue staining. EF1, EF2, EF3, EF4, EF5, EF6: alanine substitution of the 1<sup>st</sup> and 3<sup>rd</sup> positions of the loop in each EF.

(B) GST pull-down assays performed with GST-Cbp53e, hsSCGN, or GST, and purified MBP-*Drosophila*-SNAP-25 (dmSNAP-25), in the presence of 2 mM CaCl<sub>2</sub> and 0.005% Triton X-100. After incubation with soluble proteins, the resin was extensively washed.

Shown is a Coomassie blue–stained SDS–PAGE gel of purified proteins (left) and resin-bound samples (right).

(C) Sequence alignments of hsSNAP-25 (aa154-170) and its corresponding SNAP-25 sequences from representative organisms. The corresponding sequences from human SNAP-23, SNAP-29 and SNAP-47 are also listed. Residues contacting SCGN are highlighted either in grey (non-hydrophobic) or machaccino (hydrophobic residues). ▼: residues whose substitutions weaken the binding toward SCGN; \*: residue mutated in the vesicle fusion assay.

(D) GST pull-down assays performed with GST-SNAP-25-J, or its corresponding residues in SNAP-23, SNAP-29, SNAP-47, or GST, and purified hsSCGN, in the presence of 2 mM CaCl<sub>2</sub> and 0.5% Triton X-100. After incubation with soluble protein(s), the resin was extensively washed. Shown is a Coomassie blue–stained SDS–PAGE gel of purified proteins (left) and resin-bound samples (right).

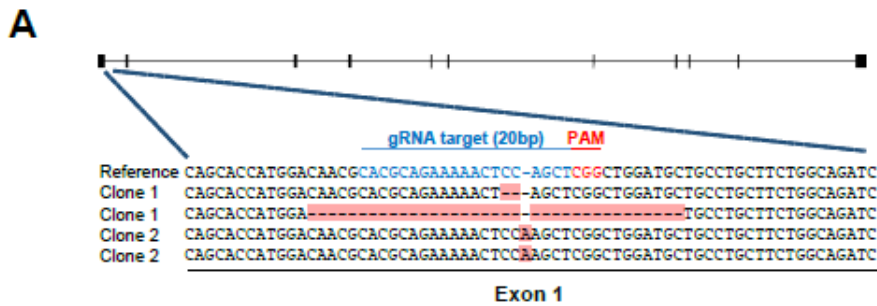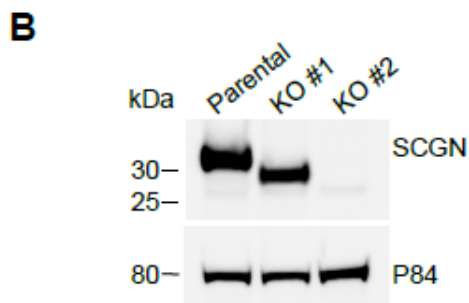

**Fig. S7. Engineering *Scgn*-deficient STC-1 clones by CRISPR/Cas9 technology.**

(A) Diagram depicting CRISPR/Cas9 targeting of exon 1 of mouse *Scgn*. Sequence of guide RNA is colored in blue, and PAM in red. Reference sequence (top), sequences of Clones 1 and 2 are shown. Note that clone 1 has at least 2 independent indel events.

(B) Expression level of SCGN in parental, KO #1, KO #2 STC-1 cells, determined by immunoblotting.

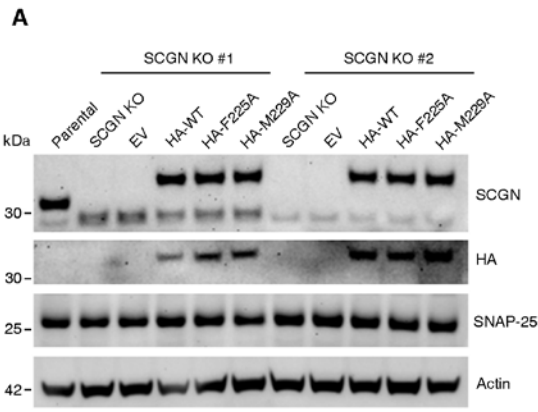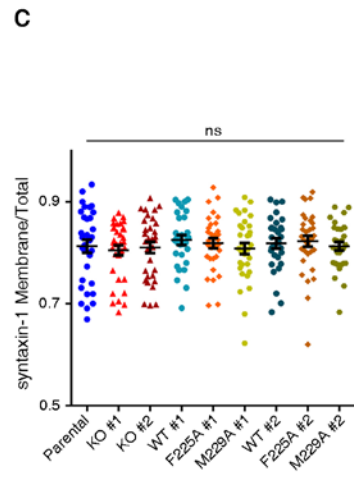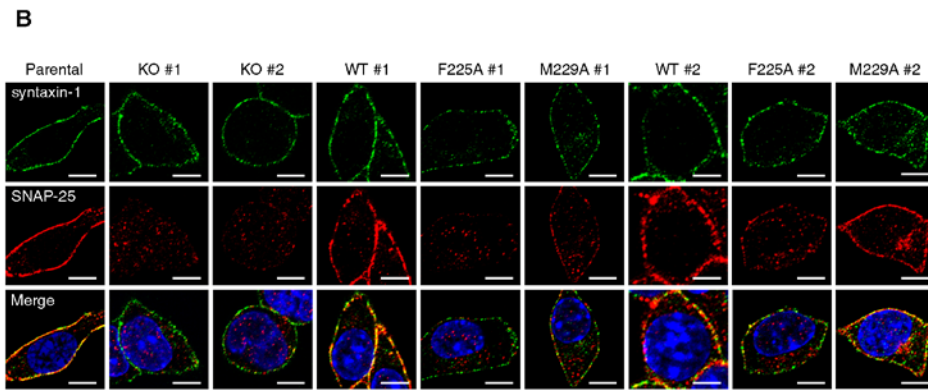

**Fig. S8. SCGN does not control the subcellular localization of syntaxin-1.**

(A) Protein levels in cell lysates of SCGN deficient and rescue STC-1 cells, determined by western blotting. SCGN deficient cell-lines were generated using the CRISPR/Cas9 technology. Two individual clones were chosen, and lentiviral reexpressed with N-terminal HA-tagged-SCGN (WT, F225A, M229A) or empty vector (EV).

(B) Parental, SCGN-KO clones and rescue STC-1 cells were co-stained with anti-syntaxin-1 and anti-SNAP-25 antibodies. Scale bars, 10 $\mu$ m.

(C) Quantification of syntaxin-1 levels in cells in (B). Membranous and total cellular fluorescence intensity ratio was calculated from 35 cells on average in each group. Bars, mean; error bars, SEM, differences among groups by unpaired student *t*-test. ns, not significant.

**A**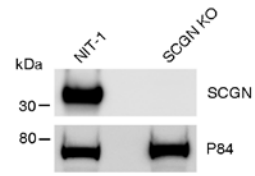**C**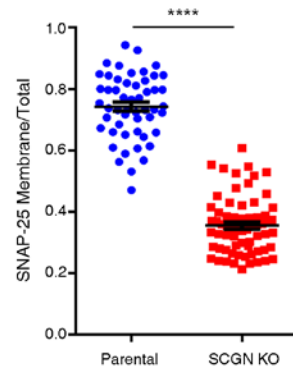**B**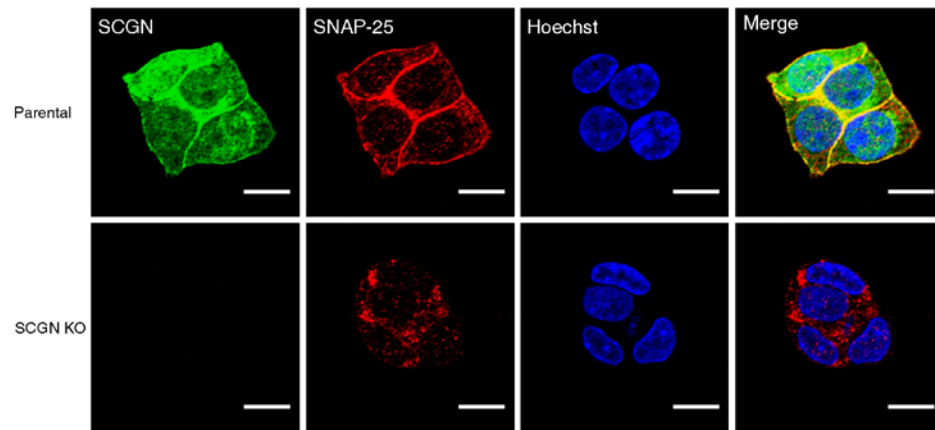



**Fig. S9. SCGN promotes plasma membrane localization of SNAP-25 in pancreatic beta cells.**

(A) Protein levels in cell lysates of parental and SCGN-KO NIT-1 cells, determined by immunoblotting. SCGN-KO cells were generated using the CRISPR/Cas9 technology, and clonal cell lines were isolated for this study.

(B) Parental and SCGN KO NIT-1 were co-stained with anti-SCGN and anti-SNAP-25 antibodies. Representative cells were shown. Scale bars, 10 $\mu$ m. Blue: DAPI staining.

(C) Quantification of SNAP-25 membranous and total cellular fluorescence intensity ratio was calculated from each cell lines used in (B). Over 50 cells were used for analysis in each group. Bars, mean; error bars, SEM, differences among groups by unpaired student *t*-test. \*\*\*\*,  $P < 0.0001$ .

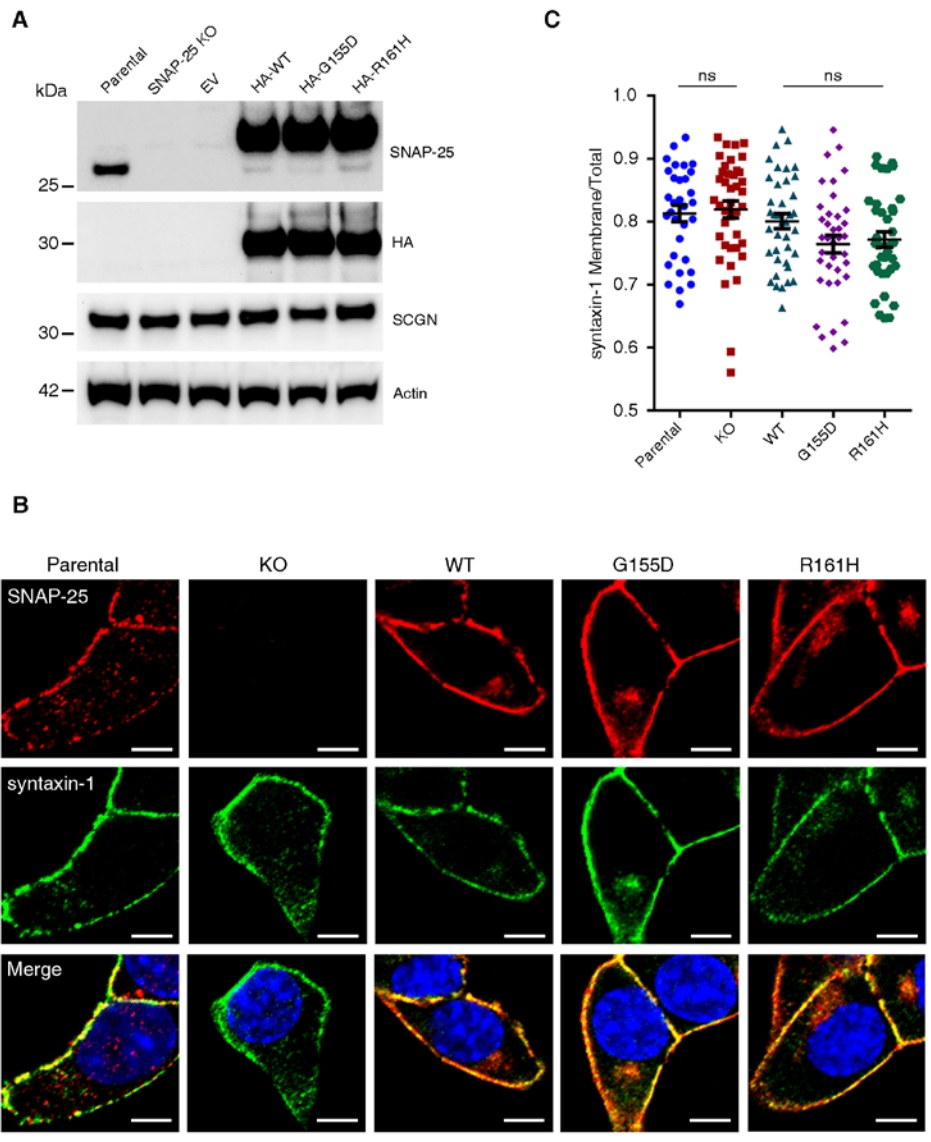

**Fig. S10. Knockout of SNAP-25 does not alter the subcellular localization of syntaxin-1.**

(A) Protein levels in cell lysates of SNAP-25 deficient and rescue STC-1 cells, determined by western blotting. SNAP-25 deficient cell-lines were generated using the CRISPR/Cas9 technology. The KO clone was lentiviral reexpressed with N-terminal HA-tagged-SNAP25 (WT, G155D, R161H) or empty vector (EV).

(B) Parental, SNAP25-KO and SNAP25-KO rescue STC-1 cells were co-stained with anti-syntaxin-1 and anti-SNAP-25 antibodies. Scale bars, 10 $\mu$ m.

(C) Quantification of syntaxin-1 levels in cells in (B). Membranous and total cellular fluorescence intensity ratio was calculated from 38 cells on average in each group. Bars, mean; error bars, SEM, differences among groups by unpaired student *t*-test. ns, not significant.

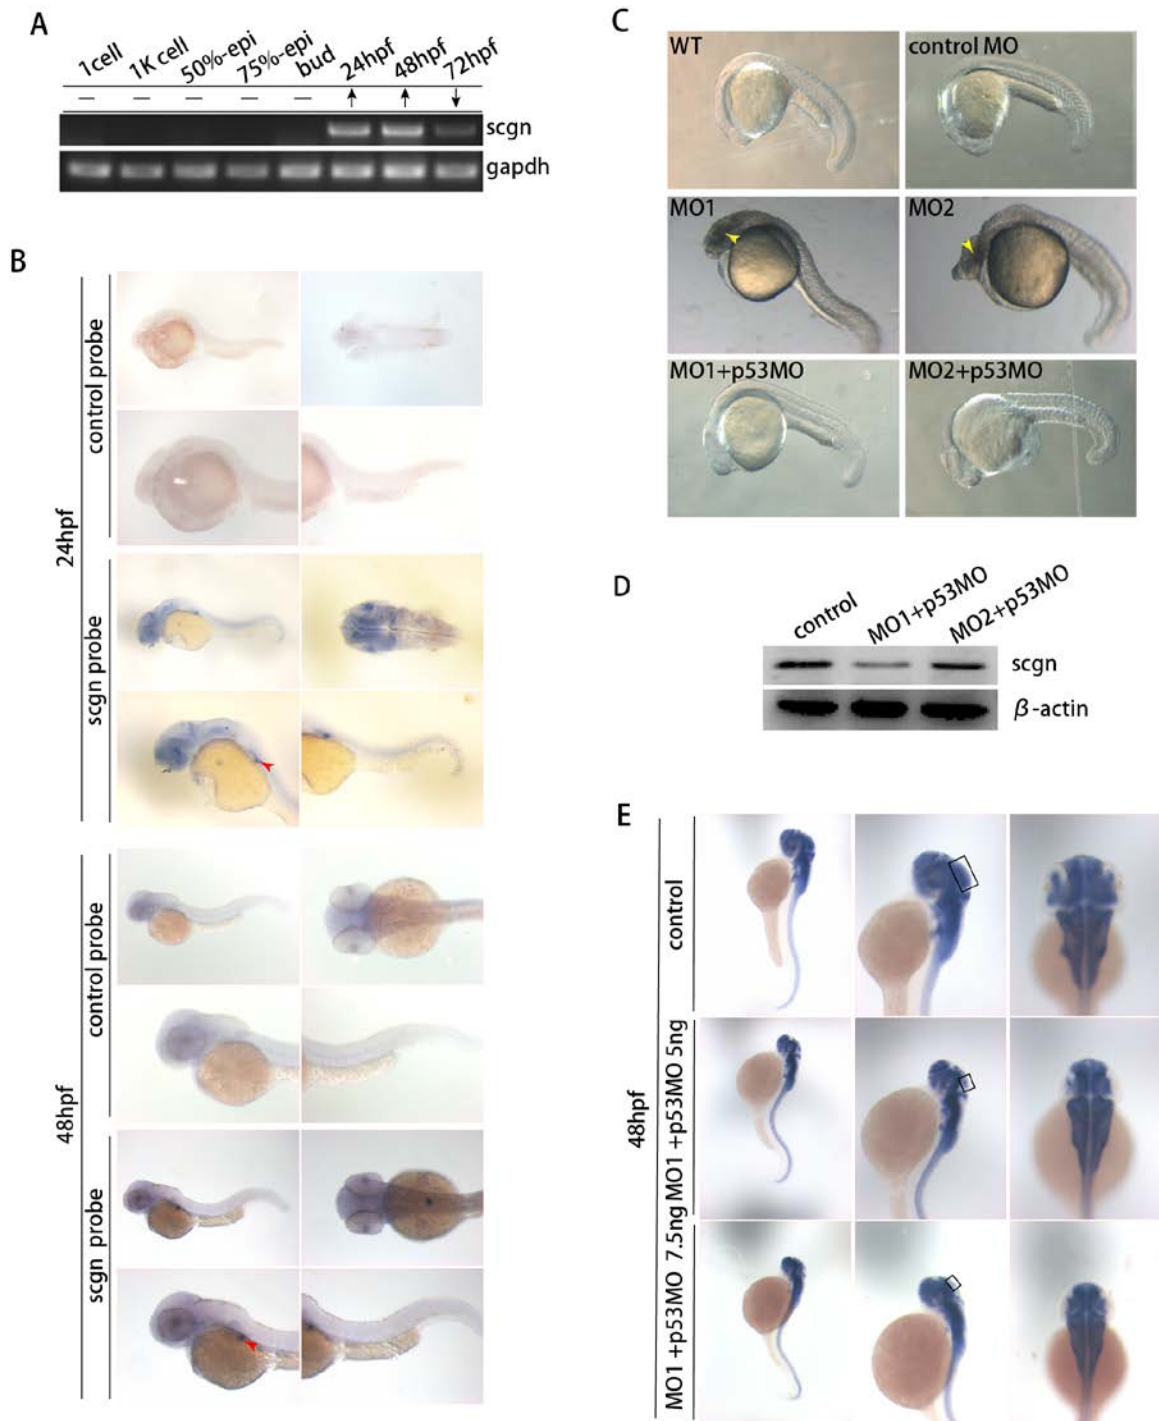

**Fig. S11. Knockdown of SCGN leads to abnormal brain development in zebrafish.**

(A) The mRNA expression levels of SCGN at the indicated developmental stages of zebrafish embryos are shown. GAPDH is used as reference. Epi, epiboly; bud, tail bud; hpf, hours post fertilization.

(B) Whole-mount in situ hybridization analysis of SCGN expression in zebrafish embryos at 24 and 48hpf. Red triangles indicate the pancreas.

(C) The injection of SCGN MO1 or MO2 led to the apoptosis of brain cells (indicated by the yellow arrow) at 24 hpf, which could be relieved by the co-injection of p53 MO. WT:wild-type; control MO: control MO injection; MO1: MO1 injection; MO2: MO2 injection; MO1+p53 MO: MO1 and p53 MO co-injection; MO2+p53 MO: MO2 and p53 MO co-injection.

(D) Immunoblot of entire zebrafish tissue extracts showing that injection of MO1 or MO2 effectively decreased the protein level of SCGN. WT: wild-type; MO1+p53 MO: co-injection of MO1 and p53 MO; MO2+p53 MO: co-injection of MO1 and p53 MO. All injections were performed at one cell stage of zebrafish development.  $\beta$ -actin was used as a loading control. Injection of MO1 and MO2 suppressed 70% and 40% of the SCGN protein level, respectively.

(E) The severity of the zebrafish phenotype correlated with the amount of MO1 injected. At the 48 hpf stage, the size of zebrafish midbrain decreased with increasing amount of MO1. The black rectangles indicate the midbrain of zebrafish embryos. Left, lateral view of whole fish. Middle, lateral view of the brain. Right, top view of the brain.

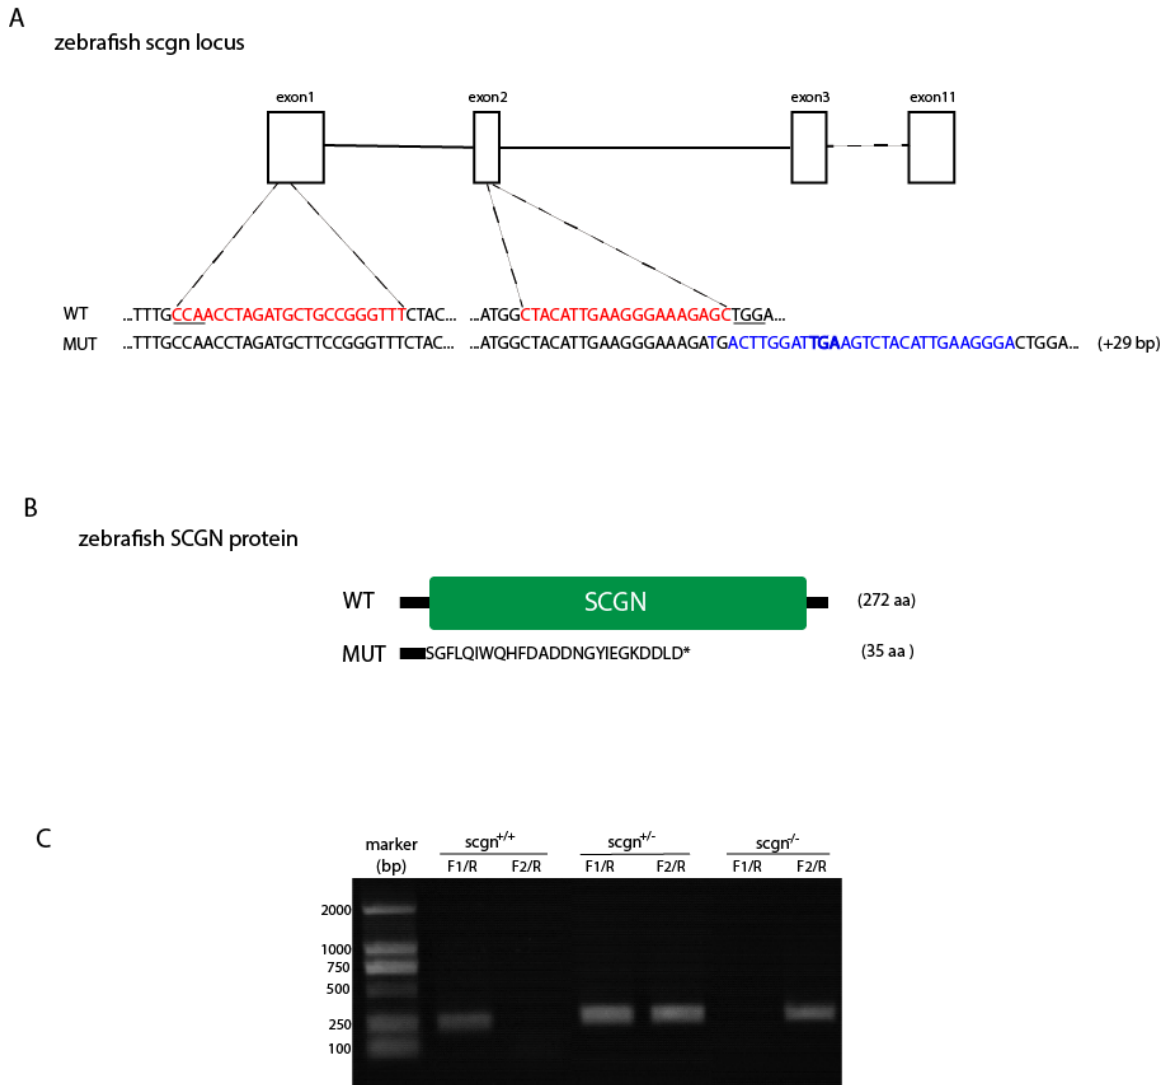

**Fig. S12. SCGN knockout in zebrafish.**

(A) CRISPR/Cas9-mediated SCGN knockout. Guide RNA targeting sequences are highlighted in red, and PAM is marked with an underscore. We recovered a stably transmitted mutant allele, which carries a single nucleotide mutation in exon 1 and 29 bp insertion within exon 2. The altered nucleotides are colored in blue.

(B) Protein sequences of SCGN WT and the truncated form encoding by the SCGN knockout zebrafish. The truncated proteins contain only 35 amino acids, due to an early termination of translation.

(C) Genotyping results of WT, SCGN heterozygous, and homozygous zebrafish. The primer sequences used for genotyping are given in Table S4.

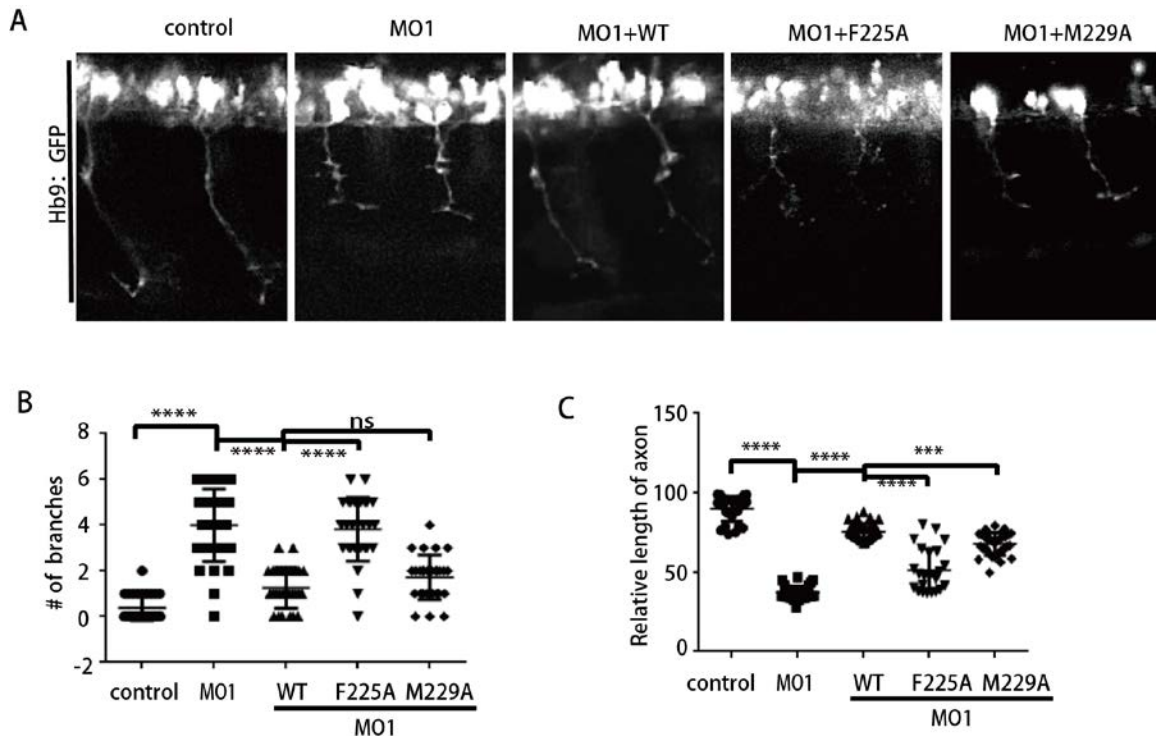

**Fig. S13. SCGN is critical for normal development of motor neuron.**

(A) Morphology of CaP axons from embryos at 48 hpf that were injected MO1 and/or different mRNA. All injections are performed at one cell stage of the Tg [hb9: GFP]<sup>ml2</sup> transgenic zebrafish embryos.

(B) Statistical results of the branch number of CaP axons in embryos treated as in A. For each group, ~30 axons from seven to nine Tg [hb9: GFP]<sup>ml2</sup> transgenic zebrafish embryos are scored. Experiments were repeated three times. Mean  $\pm$ SD, \*\*\*\*P < 0.0001; ns, not significant. P values were calculated using one-way ANOVA, Tukey's multiple comparisons test.

(C) Statistical results of relative length of CaP axons in embryos treated as in A. For each group, ~30 axons from seven to nine Tg [hb9: GFP]<sup>ml2</sup> transgenic zebrafish embryos are scored. Experiments were repeated three times. Mean  $\pm$ SD, \*\*\*\*P < 0.0001; \*\*\*P <



0.001. P values were calculated using one-way ANOVA, Tukey's multiple comparisons test.

**Fig. S14. Overexpression of SNAP-25 failed to restore hormone secretion in STC-1 deficient cells.**

(A) Expression of SNAP-25 in indicated cell lines, determined by immunoblotting.

(B) Immunofluorescence (IF) images of parental STC-1 cells, and SCGN KO #2 rescued with empty vector (EV) or HA-SNAP-25. Representative cells are shown. Images for red channel in parental and EV clones were obtained at 200% brightness level than that of HA-SNAP25 overexpressing cells. Scale bar, 16  $\mu\text{m}$ .

(C) GLP-1 secretion assay. GLP-1 measured from indicated cell lines before or after fatty acid (DHA) stimulation. Error bars, S.E.M, unpaired student *t*-test was used. \*\*\*\* *P* <0.0001.

### Non-SCGN-bound monomeric SNAP-25

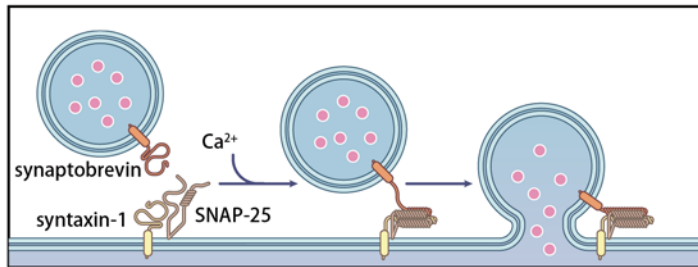

### SCGN-bound SNAP-25

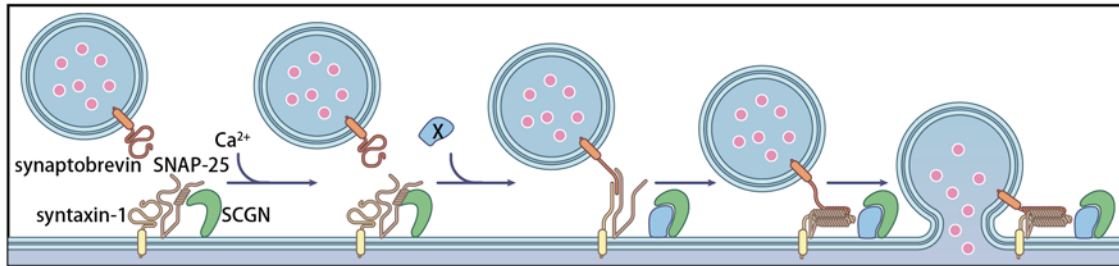

**Fig. S15. A model showing how SCGN may regulate SNARE function and exocytosis.**

SCGN interacts with the C-terminus of SNAP-25, and promotes its plasma membrane localization. On the plasma membrane, some SNAP-25 could associate with SCGN whereas some SNAP-25 does not. Top: Non-SCGN-bound monomeric SNAP-25 can quickly respond to calcium signals and form the SNARE complex to mediate vesicle exocytosis. Bottom: For the SCGN-bound SNAP-25, calcium influx dramatically enhances the interaction between SCGN and SNAP-25, inhibiting SNARE complex assembly. The inhibition needs to be released by an unknown protein or lipid (X), which displaces SNAP-25 from SCGN. Thus, SCGN could mediate slow modes of vesicle exocytosis. Other SNARE modulators, such as Munc-13, Munc-18 and synaptotagmin-1, are omitted for simplicity.



**Table S1. Crystallography Data Collection and Refinement Statistics.**

|                                                     |                                     |
|-----------------------------------------------------|-------------------------------------|
|                                                     | <i>SCGN-SNAP-25-Ca<sup>2+</sup></i> |
| Cell axial lengths (Å)                              | a=104.5, b= 107.0, c= 54.7          |
| Spacegroup                                          | P2 <sub>1</sub> 2 <sub>1</sub> 2    |
| <b>Data collection</b>                              |                                     |
| Resolution range (Å)                                | 50.00-2.37 (2.41-2.37)              |
| Number of observed reflections                      | 964901 (24390)                      |
| Number of unique reflections                        | 25808 (1167)                        |
| Completeness (%)                                    | 99.6 (99.1)                         |
| Redundancy                                          | 37.4 (20.9)                         |
| R <sub>rim</sub>                                    | 0.035 (0.342)                       |
| Highest shell CC1/2                                 | 0.639                               |
| Mean I/I <sub>sigma</sub>                           | 19.7 (1.3)                          |
| <b>Refinement</b>                                   |                                     |
| Resolution range (Å)                                | 49.96-2.37 (2.43-2.37)              |
| Number of working reflections                       | 20354 (955)                         |
| Number of test reflections                          | 1950 (89)                           |
| R <sub>work</sub> <sup>a</sup> (no. of reflections) | 0.200 (0.261)                       |
| R <sub>free</sub> <sup>b</sup> (no. of reflections) | 0.237 (0.308)                       |
| R.m.s. deviation bond lengths (Å)                   | 0.009                               |
| R.m.s. deviation bond angles (°)                    | 1.591                               |
| Mean B value                                        | 38.1                                |
| <b>Ramachandran plot</b>                            |                                     |
| Most favored regions (%)                            | 98.34                               |
| Allowed regions (%)                                 | 1.66                                |
| Disallowed regions (%)                              | 0.0                                 |

R<sub>work</sub><sup>a</sup> =  $\sum |F_o - F_c| / |F_o|$ , where F<sub>c</sub> and F<sub>o</sub> are the calculated and observed structure factor amplitudes, respectively  
R<sub>free</sub><sup>b</sup> calculated as for R<sub>work</sub> but for 5.0% of the total reflections chosen at random and omitted from refinement for all data sets  
# values in the parenthesis is information from highest resolution shell.

**Table S2. DNA Constructs Used in this Study.**

| Construct name         | Description <sup>#1</sup>              | Source or reference |
|------------------------|----------------------------------------|---------------------|
| <b>ZebrafishhsSCGN</b> |                                        |                     |
| drSCGN                 | GST-Tev-drSCGN full length             | (Bitto et al)       |
| <b>Human SCGN</b>      |                                        |                     |
| hsSCGN                 | GST-Tev-hsSCGN full length             | This study          |
| hsSCGN R198A           | GST-Tev-hsSCGN full length R198A       | This study          |
| hsSCGN F225A           | GST-Tev-hsSCGN full length F225A       | This study          |
| hsSCGN M229A           | GST-Tev-hsSCGN full length M229A       | This study          |
| hsSCGN L230A           | GST-Tev-hsSCGN full length L230A       | This study          |
| hsSCGN L232A           | GST-Tev-hsSCGN full length L232A       | This study          |
| hsSCGN V233A           | GST-Tev-hsSCGN full length V233A       | This study          |
| hsSCGN D25A/D27A       | GST-Tev-hsSCGN full length D25A/D27A   | This study          |
| hsSCGN D71A/S73A       | GST-Tev-hsSCGN full length D71A/S73A   | This study          |
| hsSCGN D118A/D120A     | GST-Tev-hsSCGN full length D118A/D120A | This study          |
| hsSCGN D161A/N163A     | GST-Tev-hsSCGN full length D161A/N163A | This study          |
| hsSCGN D210A/S212A     | GST-Tev-hsSCGN full length D210A/S212A | This study          |
| hsSCGN D254A/N256A     | GST-Tev-hsSCGN full length D254A/N256A | This study          |
| hsSCGN                 | 2xHA-hsSCGN full length                | This study          |
| hsSCGN_F225A           | 2xHA-hsSCGN_F225A                      | This study          |
| hsSCGN_M229A           | 2xHA-hsSCGN_M225A                      | This study          |
| <b>Human SNAP-25</b>   |                                        |                     |
| SNAP-25                | His-thrombin-SNAP-25A-full length      | (Yang et al., 2015) |
| SN1                    | GST-thrombin-SNAP-25A (11-83)          | This study          |
| SN2                    | GST-thrombin-SNAP-25A (138-206)        | This study          |
| SNAP-25 A              | GST-thrombin-SNAP-25A (138-160)        | This study          |
| SNAP-25 B              | GST-thrombin-SNAP-25A (161-206)        | This study          |
| SNAP-25 C              | GST-thrombin-SNAP-25A (138-180)        | This study          |
| SNAP-25 D              | GST-thrombin-SNAP-25A (181-206)        | This study          |
| SNAP-25 E              | GST-thrombin-SNAP-25A (161-180)        | This study          |
| SNAP-25 F              | GST-thrombin-SNAP-25A (138-170)        | This study          |
| SNAP-25 G              | GST-thrombin-SNAP-25A (148-180)        | This study          |
| SNAP-25 H              | GST-thrombin-SNAP-25A (148-170)        | This study          |
| SNAP-25 I              | GST-thrombin-SNAP-25A (138-165)        | This study          |
| SNAP-25 J              | GST-thrombin-SNAP-25A (143-170)        | This study          |
| SNAP-25 J L160A        | GST-thrombin-SNAP-25A (143-170) L160A  | This study          |
| SNAP-25 J A164S        | GST-thrombin-SNAP-25A (143-170) A164S  | This study          |
| SNAP-25 J G155D        | GST-thrombin-SNAP-25A (143-170) G155D  | This study          |
| SNAP-25 J G158S        | GST-thrombin-SNAP-25A (143-170) G158S  | This study          |
| SNAP-25 J R161H        | GST-thrombin-SNAP-25A (143-170) R161H  | This study          |

|                  |                                        |                     |
|------------------|----------------------------------------|---------------------|
| SNAP-25 J R170H  | GST-thrombin-SNAP-25A (143-170) R170H  | This study          |
| SNAP-25b         | 2xHA-SNAP-25b full length              | This study          |
| SNAP-25b_G155D   | 2xHA-SNAP-25b_G155D                    | This study          |
| SNAP-25b_R161H   | 2xHA-SNAP-25b_R161H                    | This study          |
| dmSNAP-25        | MBP-fly-SNAP-25                        | This study          |
| SNAP-23          | GST-SNAP-23 ()                         | This study          |
| SNAP-29          | GST-SNAP-29 ()                         | This study          |
| SNAP-47          | GST-SNAP-47 ()                         | This study          |
| <b>OTHER</b>     |                                        |                     |
| Cbp53e           | GST-TEV- fly SCGN full length          | This study          |
| synaptobrevin    | GST-thrombin-rat synaptobrevin (29-94) | (Yang et al., 2015) |
| syntaxin 1A      | GST-thrombin-rat syntaxin 1A (191-253) | (Yang et al., 2015) |
| SNAP-25 guideRNA | pLentiCRISPRv1-sgSNAP-25               | This study          |
| SCGN guideRNA    | pLentiCRISPRv1-sgSCGN                  | This study          |
|                  |                                        |                     |
|                  |                                        |                     |
|                  |                                        |                     |

**Table S3. Summary of Antibodies Used in this Study**

| Antibody        | Source            | Catalog#  |
|-----------------|-------------------|-----------|
| SCGN            | Santa Cruz        | SC-374355 |
| SNAP-25         | Abcam             | Ab5666    |
| Syntaxin-1      | Santa Cruz        | SC-12736  |
| HA              | Biologend         | 901502    |
| $\beta$ -Actin  | Sigma             | A5441     |
| Alexa Fluor 488 | Life Technologies | A11029    |
| Alexa Fluor 555 | Life Technologies | A21428    |



**Table S4: Sequences of primers, CRISPR targeting regions, and Morpholino**

| sqRT-PCR primer               |                                              |
|-------------------------------|----------------------------------------------|
| <i>Gapdh</i>                  | CTGGTGACCCGTGCTGCTTT (forward)               |
|                               | GTTTGCCGCCTTCTGCCTTA (reverse)               |
| <i>Huc</i>                    | CTATGTGGATCCCAACGACGCCGAC (forward)          |
|                               | CAACTGCTCCATGTCTTTCTG (reverse)              |
| CRISPR target sequences (PAM) |                                              |
| <i>SCGN</i> KO STC-1 cells    | <u>CCGCACGCAGAAAACTCCAGCT</u> (in exon 1)    |
| <i>SCGN</i> KO STC-1 cells    | <u>CCGAGGCCGCATACTGATGAAAG</u> (in exon 3)   |
| <i>SNAP-25</i> KO STC-1 cells | AGACATGCGCAATGAGCT <u>TGG</u> (in exon 1)    |
| <i>SCGN</i> KO zebrafish      | <u>CCAACCTAGATGCTGCCGGGTTT</u> (in exon 1)   |
| <i>SCGN</i> KO zebrafish      | CTACATTGAAGGGAAAGAGCT <u>TGG</u> (in exon 2) |
| Zebrafish Genotyping          |                                              |
| <i>F1</i>                     | CATTGAAGGGAAAGAGCT                           |
| <i>F2</i>                     | GTCTACATTGAAGGGACT                           |
| <i>reverse</i>                | TGAGCATTTAAGAGAAACGACA                       |
| Morpholino                    |                                              |
| <i>scgn</i> MO1               | GGTTGGCAAAGCACTGTCCATGAT                     |
| <i>scgn</i> MO2               | GTGGTTTATGTTTGATACCTTTGGC                    |
| <i>control</i>                | CCTCTACCTCAGTTACAATTTATA                     |
| <i>p53</i> MO                 | GCGCCATTGCTTTGCAAGAATTG                      |
